# Supplementary material
Source: publisher figshare collection journal article supplement (https://gsapubs.figshare.com/ndownloader/files/23300714)
Supplement: Supplementary file 1 [file 23300714]

## Sheet: Sheet1
Analytical spot	207Pb/235U	2SE	206Pb/238U	2SE	LAM	206Pb-238U age (Ma)	±
11AM27F- 1	6.7579	0.29568	0.33595	0.00441	0.00745739	1867.2	21.27
11AM27F- 3	0.10013	0.00627	0.01457	0.00023	0.0183413	93.2	1.49
11AM27F- 4	0.08308	0.01172	0.01286	0.00035	0.0149317	82.4	2.24
11AM27F- 5	0.10474	0.00616	0.01548	0.00025	0.0202922	99	1.56
11AM27F- 6	0.10358	0.01576	0.01435	0.00039	0.0123731	91.9	2.49
11AM27F- 7	0.11061	0.02289	0.01439	0.00057	0.0124509	92.1	3.65
11AM27F- 8	0.09949	0.025	0.01562	0.00049	0.0098	99.9	3.13
11AM27F- 10	0.12502	0.02608	0.01295	0.00052	0.00996933	82.9	3.29
11AM27F- 12	0.09567	0.01579	0.01507	0.00037	0.0117163	96.4	2.37
11AM27F- 13	0.24846	0.00942	0.03465	0.00047	0.0249469	219.6	2.91
11AM27F- 14	0.17773	0.01838	0.01441	0.00038	0.0103373	92.2	2.44
11AM27F- 15	0.07226	0.00436	0.01095	0.00018	0.0206422	70.2	1.13
11AM27F- 16	0.19616	0.02473	0.02064	0.00055	0.0111201	131.7	3.5
11AM27F- 17	0.24505	0.02403	0.03749	0.00076	0.0158136	237.3	4.71
11AM27F- 18	0.10283	0.01687	0.01563	0.0004	0.0118554	100	2.54
11AM27F- 19	0.0854	0.01029	0.01383	0.00034	0.0165209	88.6	2.16
11AM27F- 20	0.05113	0.00693	0.00787	0.00021	0.0151515	50.5	1.36
11AM27F- 21	0.12101	0.01227	0.01756	0.00037	0.0150774	112.2	2.36
11AM27F- 22	0.0958	0.00556	0.01515	0.00024	0.0215827	96.9	1.5
11AM27F- 23	0.05921	0.00697	0.00748	0.0002	0.0143472	48	1.28
11AM27F- 24	0.08592	0.00961	0.01366	0.00028	0.0145682	87.5	1.8
11AM27F- 25	0.13931	0.01876	0.01524	0.00043	0.0114606	97.5	2.7
11AM27F- 26	0.23193	0.05108	0.01898	0.00099	0.00969068	121.2	6.23
11AM27F- 27	0.09533	0.01569	0.0133	0.00041	0.0130656	85.2	2.62
11AM27F- 28	0.05692	0.00761	0.00876	0.00022	0.0144547	56.2	1.41
11AM27F- 29	0.14919	0.01821	0.01637	0.00041	0.0112576	104.7	2.58
11AM27F- 30	0.05955	0.0048	0.00832	0.00016	0.0166667	53.4	1.02
11AM27F- 31	0.07075	0.02067	0.00871	0.00045	0.0108853	55.9	2.85
11AM27F- 32	0.08895	0.03184	0.01401	0.00067	0.0105214	89.7	4.28
11AM27F- 33	1.16758	0.09042	0.12189	0.00204	0.0112807	741.4	11.74
11AM27F- 34	1.02464	0.05067	0.11031	0.00162	0.0159858	674.5	9.39
11AM27F- 35	0.11805	0.01524	0.0168	0.00044	0.0144357	107.4	2.78
11AM27F- 36	0.08927	0.01277	0.01356	0.00035	0.013704	86.8	2.22
11AM27F- 37	0.18452	0.0125	0.02709	0.00046	0.0184	172.3	2.92
11AM27F- 38	0.05893	0.00329	0.00875	0.00014	0.0212766	56.2	0.91
11AM27F- 39	0.11991	0.01355	0.0157	0.00037	0.0136531	100.4	2.36
11AM27F- 40	0.1439	0.01314	0.01939	0.00041	0.0156012	123.8	2.58
11AM27F- 41	0.09714	0.04461	0.01515	0.00091	0.0101995	96.9	5.78
11AM27F- 42	0.36986	0.03162	0.01534	0.0004	0.00632511	98.1	2.55
11AM27F- 43	0.10344	0.01387	0.01501	0.00039	0.0140591	96	2.46
11AM27F- 44	0.1479	0.016	0.02146	0.00046	0.014375	136.9	2.91
11AM27F- 45	0.14975	0.01924	0.01313	0.0004	0.010395	84.1	2.56
11AM27F- 46	0.1603	0.01911	0.01323	0.00041	0.0107274	84.7	2.61
11AM27F- 47	0.09668	0.00731	0.01411	0.00026	0.0177839	90.3	1.65
11AM27F- 48	0.28451	0.02885	0.01583	0.00045	0.00779896	101.3	2.86
11AM27F- 49	0.05129	0.00385	0.00767	0.00014	0.0181818	49.2	0.9
11AM27F- 50	0.92689	0.05773	0.10771	0.0017	0.0147237	659.4	9.87
11AM27F- 51	0.0852	0.01308	0.00813	0.00028	0.0107034	52.2	1.82
11AM27F- 52	0.1062	0.00597	0.01461	0.00024	0.0201005	93.5	1.52
11AM27F- 53	0.09592	0.01833	0.01384	0.00046	0.0125477	88.6	2.94
11AM27F- 54	0.09886	0.00931	0.01366	0.00029	0.0155747	87.5	1.82
11AM27F- 55	0.05952	0.00259	0.00891	0.00013	0.0250965	57.2	0.85
11AM27F- 56	0.12662	0.00924	0.01677	0.0003	0.0162338	107.2	1.93
11AM27F- 57	0.08866	0.01016	0.01338	0.00032	0.015748	85.7	2.04
11AM27F- 59	0.04855	0.00485	0.00752	0.00017	0.0175258	48.3	1.08
11AM27F- 60	0.1073	0.00779	0.01596	0.00028	0.0179718	102.1	1.8
11AM27F- 61	0.11198	0.01281	0.01652	0.00038	0.0148322	105.6	2.43
11AM27F- 62	0.05974	0.00951	0.00891	0.00026	0.0136698	57.2	1.66
11AM27F- 63	0.18167	0.0227	0.01446	0.00044	0.00969163	92.5	2.82
11AM27F- 64	0.09774	0.00749	0.01485	0.00027	0.018024	95.1	1.73
11AM27F- 65	0.1786	0.01765	0.01059	0.00031	0.00878187	67.9	1.96
11AM27F- 66	0.07133	0.00954	0.01089	0.00031	0.0162474	69.8	1.97
11AM27F- 67	0.51932	0.04561	0.06591	0.00121	0.0132646	411.4	7.33
11AM27F- 68	0.10067	0.00826	0.01502	0.0003	0.0181598	96.1	1.88
11AM27F- 69	0.09314	0.01536	0.01395	0.0004	0.0130208	89.3	2.57
11AM27F- 70	0.10915	0.02277	0.01625	0.00062	0.0136144	103.9	3.96
11AM27F- 71	0.07642	0.0062	0.01143	0.00021	0.0169355	73.3	1.36
11AM27F- 72	0.0791	0.02734	0.01194	0.00051	0.00932699	76.5	3.26
11AM27F- 73	0.09052	0.00845	0.01315	0.00028	0.016568	84.2	1.8
11AM27F- 75	0.14273	0.01479	0.01415	0.00036	0.0121704	90.6	2.29
11AM27F- 76	0.10457	0.022	0.01309	0.0005	0.0113636	83.8	3.15
11AM27F- 77	0.09595	0.01384	0.01446	0.00036	0.0130058	92.6	2.28
11AM27F- 78	0.0529	0.00473	0.00804	0.00016	0.0169133	51.6	1.04
11AM27F- 79	0.13113	0.01767	0.01208	0.00037	0.0104697	77.4	2.37
11AM27F- 80	0.11395	0.0107	0.01348	0.0003	0.0140187	86.3	1.9
11AM27F- 81	0.08274	0.01996	0.00923	0.0004	0.01002	59.2	2.54
11AM27F- 84	0.09523	0.00705	0.01378	0.00025	0.0177305	88.2	1.6
11AM27F- 85	0.19276	0.03799	0.00905	0.00053	0.00697552	58.1	3.36
11AM27F- 86	0.10952	0.01835	0.01677	0.00048	0.013079	107.2	3.07
11AM27F- 87	0.74716	0.03108	0.09118	0.0013	0.0209138	562.5	7.66
11AM27F- 88	0.10167	0.01658	0.01229	0.00041	0.0123643	78.7	2.59
11AM27F- 89	0.09506	0.01113	0.01417	0.00032	0.0143756	90.7	2.01
11AM27F- 90	0.0776	0.0103	0.00905	0.00027	0.0131068	58.1	1.72
11AM27F- 91	0.09071	0.00967	0.01478	0.00032	0.016546	94.6	2.01
11AM27F- 92	0.10915	0.00711	0.01661	0.00028	0.0196906	106.2	1.8
11AM27F- 93	0.1443	0.03737	0.01186	0.00072	0.0096334	76	4.58
11AM27F- 94	0.08631	0.03177	0.01293	0.00065	0.0102298	82.8	4.16
11AM27F- 95	0.12663	0.02528	0.0148	0.00057	0.0112737	94.7	3.65
11AM27F- 96	0.11105	0.01029	0.01401	0.0003	0.0145773	89.7	1.92
11AM27F- 97	0.09051	0.0212	0.01003	0.00042	0.00990566	64.3	2.69
11AM27F- 98	0.09131	0.00958	0.01406	0.00031	0.0161795	90	1.99
11AM27F- 99	0.06009	0.00515	0.00854	0.00018	0.0174757	54.8	1.14
11AM27F- 100	0.17752	0.04836	0.01397	0.00078	0.00806452	89.4	4.96
11AM27F- 101	0.08676	0.00663	0.01269	0.00024	0.0180995	81.3	1.54
11AM27F- 102	0.10708	0.01906	0.01579	0.00047	0.0123295	101	2.95
11AM27F- 103	0.04686	0.00449	0.00733	0.00016	0.0178174	47.1	1
11AM27F- 104	0.09621	0.00676	0.01465	0.00025	0.0184911	93.7	1.61
11AM27F- 105	0.11299	0.00987	0.01491	0.00031	0.0157042	95.4	1.99
11AM27F- 106	0.04751	0.0176	0.01045	0.0004	0.0113636	67	2.54
11AM27F- 107	0.09719	0.01632	0.0147	0.00046	0.0140931	94	2.91
11AM27F- 108	0.07755	0.01342	0.01189	0.00035	0.0130402	76.2	2.25
11AM27F- 109	0.0698	0.01168	0.00883	0.00029	0.0124144	56.7	1.88
11AM27F- 111	0.06376	0.00562	0.0099	0.0002	0.0177936	63.5	1.31
11AM27F- 112	0.10529	0.0146	0.01563	0.00038	0.0130137	100	2.4
11AM27F- 113	0.0878	0.01799	0.01365	0.00042	0.0116732	87.4	2.7
11AM27F- 114	0.08643	0.027	0.0135	0.00051	0.00944444	86.4	3.25
11AM27F- 115	0.07178	0.00789	0.00819	0.00021	0.013308	52.6	1.34
11AM27F- 116	0.09909	0.00654	0.01417	0.00025	0.0191131	90.7	1.6
11AM27F- 117	0.09214	0.00941	0.01429	0.00031	0.0164718	91.5	1.96
11AM27F- 118	0.05867	0.00576	0.00973	0.0002	0.0173611	62.4	1.26
11AM27F- 119	0.05193	0.00906	0.00822	0.00022	0.0121413	52.8	1.42
11AM27F- 120	0.05704	0.01081	0.00853	0.00028	0.012951	54.8	1.76
11AM27F- 121	0.07108	0.02445	0.00895	0.00049	0.0100204	57.4	3.14
11AM27F- 122	0.10519	0.01002	0.01564	0.00033	0.0164671	100	2.1
11AM27F- 123	0.14006	0.02359	0.01407	0.00052	0.0110216	90.1	3.28
11AM27F- 124	0.14584	0.03828	0.01666	0.00076	0.00992685	106.5	4.85
11AM27F- 125	0.11036	0.01488	0.01264	0.00036	0.0120968	81	2.3
11AM27F- 126	0.16994	0.0088	0.02599	0.0004	0.0227273	165.4	2.52
11AM27F- 127	0.10136	0.01686	0.01503	0.00047	0.0139383	96.1	2.95
11AM27F- 128	5.0722	0.29236	0.343	0.00516	0.00882474	1901.1	24.74
11AM27F- 129	0.12634	0.01391	0.0148	0.00037	0.0132998	94.7	2.36
11AM27F- 130	0.10545	0.01258	0.01362	0.00039	0.0155008	87.2	2.45
11AM27F- 131	0.10565	0.00748	0.01606	0.00027	0.0180481	102.7	1.73
11AM27F- 132	0.12166	0.01778	0.01464	0.00047	0.0132171	93.7	2.97
11AM27F- 133	0.08596	0.03571	0.01325	0.00062	0.00868104	84.8	3.92
11AM27F- 134	0.15483	0.1669	0.01825	0.0027	0.00808868	116.6	17.12
11AM27F- 135	0.08101	0.02133	0.01224	0.00055	0.0128926	78.5	3.52
11AM27F- 136	0.09552	0.00725	0.01443	0.00027	0.0186207	92.4	1.69
11AM27F- 137	0.18292	0.01758	0.0232	0.00052	0.0147895	147.8	3.26
11AM27F- 138	0.5292	0.02882	0.07053	0.00108	0.018737	439.3	6.5
11AM27F- 139	0.05658	0.00773	0.00841	0.00022	0.0142303	54	1.4
11AM27F- 140	0.05576	0.00531	0.00883	0.00018	0.0169492	56.7	1.15
11AM27F- 141	0.06171	0.01701	0.00819	0.00038	0.0111699	52.6	2.44
11AM27F- 142	0.12057	0.01802	0.01653	0.00049	0.013596	105.7	3.08
11AM27F- 143	0.12246	0.01151	0.01786	0.00037	0.016073	114.1	2.31
11AM27F- 144	0.09617	0.01473	0.01446	0.0004	0.0135777	92.5	2.54
11AM27F- 145	2.79642	0.26256	0.22431	0.00386	0.0073507	1304.6	20.33
11AM27F- 146	0.0585	0.00931	0.0078	0.00026	0.0139635	50.1	1.69
11AM27F- 147	0.06404	0.03535	0.01007	0.00059	0.00834512	64.6	3.8
11AM27F- 148	0.05472	0.00699	0.00852	0.00022	0.0157368	54.7	1.44
11AM27M- 1	0.05243	0.00331	0.00819	0.00014	0.021148	52.6	0.91
11AM27M- 2	0.07181	0.01242	0.01079	0.00043	0.0173108	69.2	2.77
11AM27M- 3	0.12684	0.02	0.01309	0.0006	0.015	83.9	3.79
11AM27M- 4	0.11593	0.01002	0.01342	0.00033	0.0164671	86	2.1
11AM27M- 5	0.18598	0.01909	0.02338	0.00062	0.0162389	149	3.88
11AM27M- 6	0.09819	0.01438	0.01254	0.00049	0.0170376	80.3	3.11
11AM27M- 7	0.10756	0.01137	0.01335	0.00038	0.0167106	85.5	2.43
11AM27M- 8	0.1125	0.01038	0.01299	0.00033	0.015896	83.2	2.11
11AM27M- 9	0.20097	0.02163	0.01387	0.00047	0.0108645	88.8	2.99
11AM27M- 10	0.33624	0.02159	0.04607	0.00079	0.0182955	290.3	4.85
11AM27M- 11	0.11186	0.0119	0.01406	0.00039	0.0163866	90	2.47
11AM27M- 12	0.09508	0.01526	0.01456	0.00051	0.0167104	93.2	3.27
11AM27M- 13	0.0592	0.00369	0.00753	0.00014	0.0189702	48.4	0.88
11AM27M- 14	0.09659	0.01902	0.01294	0.00054	0.0141956	82.9	3.41
11AM27M- 15	0.1128	0.01632	0.01346	0.00051	0.015625	86.2	3.24
11AM27M- 16	0.11434	0.00511	0.01714	0.00024	0.0234834	109.5	1.55
11AM27M- 17	0.19495	0.01237	0.02381	0.00044	0.017785	151.7	2.76
11AM27M- 18	0.09013	0.00681	0.01326	0.00027	0.0198238	84.9	1.72
11AM27M- 19	0.05163	0.00299	0.00738	0.00013	0.0217391	47.4	0.83
11AM27M- 20	0.0796	0.00556	0.01188	0.00024	0.0215827	76.1	1.5
11AM27M- 21	0.10272	0.00554	0.01535	0.00025	0.0225632	98.2	1.56
11AM27M- 22	13.6354	0.83734	0.46929	0.00643	0.00383954	2480.4	28.23
11AM27M- 23	0.10038	0.01216	0.0126	0.0004	0.0164474	80.7	2.57
11AM27M- 24	0.04962	0.00418	0.00763	0.00017	0.0203349	49	1.07
11AM27M- 25	0.11505	0.01855	0.01441	0.00057	0.0153639	92.2	3.61
11AM27M- 26	0.13826	0.03309	0.00958	0.00079	0.0119371	61.5	5.01
11AM27M- 27	0.0727	0.01081	0.01106	0.00042	0.0194265	70.9	2.68
11AM27M- 28	0.16482	0.02945	0.0137	0.00082	0.0139219	87.7	5.24
11AM27M- 29	0.09741	0.00944	0.01309	0.00034	0.0180085	83.8	2.14
11AM27M- 30	1.04717	0.12316	0.02188	0.00118	0.00479052	139.5	7.44
11AM27M- 31	0.10379	0.00938	0.01327	0.00034	0.0181237	85	2.15
11AM27M- 32	0.14445	0.05487	0.01428	0.0013	0.0118462	91.4	8.27
11AM27M- 33	0.10324	0.00927	0.01323	0.00032	0.01726	84.7	2.05
11AM27M- 34	0.09106	0.02499	0.01357	0.00066	0.0132053	86.9	4.19
11AM27M- 35	0.08577	0.01857	0.00829	0.00048	0.0129241	53.2	3.05
11AM27M- 36	0.09241	0.01343	0.01441	0.00045	0.0167535	92.2	2.88
11AM27M- 37	0.14178	0.02543	0.01285	0.00066	0.0129768	82.3	4.18
11AM27M- 38	0.10067	0.0092	0.01336	0.00033	0.0179348	85.5	2.11
11AM27M- 39	0.09551	0.0073	0.01402	0.00029	0.019863	89.8	1.84
11AM27M- 40	0.09455	0.00905	0.01348	0.00035	0.019337	86.3	2.23
11AM27M- 41	0.07042	0.01379	0.01023	0.00047	0.0170413	65.6	2.99
11AM27M- 42	0.09026	0.01097	0.01347	0.00038	0.01732	86.3	2.42
11AM27M- 43	0.09599	0.01691	0.01446	0.0005	0.0147842	92.5	3.19
11AM27M- 44	0.06853	0.01434	0.01015	0.00043	0.014993	65.1	2.77
11AM27M- 45	0.05252	0.00459	0.00802	0.00018	0.0196078	51.5	1.14
11AM27M- 46	0.07016	0.00622	0.00723	0.0002	0.0160772	46.5	1.26
11AM27M- 47	0.11001	0.0225	0.01476	0.00072	0.016	94.5	4.56
11AM27M- 48	0.12003	0.01047	0.01377	0.00035	0.0167144	88.1	2.24
11AM27M- 49	0.10344	0.01605	0.01461	0.00055	0.017134	93.5	3.51
11AM27M- 50	0.07419	0.01677	0.01149	0.00056	0.0166965	73.7	3.58
11AM27M- 51	0.10111	0.01207	0.01319	0.00041	0.0169843	84.4	2.62
11AM27M- 52	0.08236	0.00518	0.01229	0.00022	0.0212355	78.8	1.39
11AM27M- 53	0.07644	0.01061	0.00814	0.0003	0.0141376	52.3	1.95
11AM27M- 54	0.09204	0.00782	0.01289	0.0003	0.0191816	82.5	1.89
11AM27M- 55	0.08792	0.013	0.01383	0.00043	0.0165385	88.5	2.74
11AM27M- 56	0.07169	0.0054	0.00983	0.00021	0.0194444	63.1	1.34
11AM27M- 57	0.65965	0.08617	0.02236	0.00105	0.00609261	142.6	6.62
11AM27M- 58	0.09583	0.00663	0.01474	0.00027	0.020362	94.3	1.74
11AM27M- 59	0.10299	0.01412	0.00807	0.00034	0.0120397	51.8	2.16
11AM27M- 60	0.07773	0.00926	0.01081	0.00033	0.0178186	69.3	2.13
11AM27M- 61	0.40304	0.06689	0.02883	0.00141	0.0105397	183.2	8.86
11AM27M- 62	0.10989	0.01747	0.01469	0.00055	0.0157413	94	3.52
11AM27M- 63	0.10041	0.00957	0.01341	0.00034	0.0177638	85.9	2.15
11AM27M- 64	0.09145	0.00738	0.0134	0.00029	0.0196477	85.8	1.86
11AM27M- 65	0.08724	0.00974	0.01239	0.00035	0.0179671	79.3	2.23
11AM27M- 66	0.10557	0.00897	0.01445	0.00033	0.0183946	92.5	2.12
11AM27M- 67	0.06537	0.00369	0.00734	0.00014	0.0189702	47.1	0.87
11AM27M- 68	0.04915	0.00844	0.00749	0.00029	0.0171801	48.1	1.84
11AM27M- 69	0.16572	0.02765	0.01386	0.0006	0.0108499	88.8	3.83
11AM27M- 70	0.14998	0.01634	0.01467	0.00047	0.0143819	93.9	3
11AM27M- 71	0.7482	0.03256	0.0917	0.00125	0.0191953	565.6	7.38
11AM27M- 72	0.093	0.01088	0.01267	0.00038	0.0174632	81.2	2.45
11AM27M- 73	0.05356	0.00902	0.0078	0.0003	0.0166297	50.1	1.92
11AM27M- 74	0.10576	0.01056	0.01406	0.00038	0.0179924	90	2.42
11AM27M- 75	0.10344	0.00611	0.01449	0.00026	0.0212766	92.7	1.63
11AM27M- 76	0.06077	0.00525	0.00962	0.00022	0.0209524	61.7	1.4
11AM27M- 77	0.07916	0.00443	0.01207	0.0002	0.0225734	77.3	1.27
11AM27M- 78	0.7083	0.06324	0.01459	0.00064	0.00506009	93.4	4.07
11AM27M- 79	0.13775	0.01434	0.01671	0.00047	0.0163877	106.8	3.01
11AM27M- 80	0.07818	0.0056	0.00926	0.00019	0.0169643	59.4	1.24
11AM27M- 81	0.28175	0.03988	0.00925	0.00062	0.00777332	59.3	3.95
11AM27M- 82	0.07304	0.00701	0.01099	0.00027	0.0192582	70.4	1.69
11AM27M- 83	0.05223	0.00541	0.00786	0.0002	0.0184843	50.5	1.26
11AM27C- 1	0.29988	0.02432	0.00956	0.00036	0.00740132	61.3	2.27
11AM27C- 2	0.07392	0.00864	0.0117	0.00033	0.0190972	75	2.11
11AM27C- 3	0.07653	0.01739	0.01157	0.00057	0.0163887	74.1	3.65
11AM27C- 4	0.09105	0.00891	0.01313	0.00033	0.0185185	84.1	2.13
11AM27C- 5	0.352	0.04143	0.01565	0.00068	0.00820661	100.1	4.34
11AM27C- 6	0.0996	0.01173	0.01481	0.00044	0.0187553	94.8	2.78
11AM27C- 7	0.10618	0.01828	0.01547	0.00056	0.0153173	99	3.53
11AM27C- 8	0.24269	0.03254	0.0143	0.00061	0.00937308	91.5	3.87
11AM27C- 9	0.09266	0.01363	0.01255	0.00044	0.0161409	80.4	2.8
11AM27C- 11	0.10303	0.01595	0.01299	0.00046	0.0144201	83.2	2.93
11AM27C- 12	0.05735	0.00974	0.00904	0.00031	0.0159138	58	1.98
11AM27C- 13	0.05305	0.0069	0.00884	0.00023	0.0166667	56.8	1.46
11AM27C- 14	0.07951	0.0094	0.00746	0.00026	0.0138298	47.9	1.69
11AM27C- 15	0.20796	0.02051	0.02956	0.00072	0.0175524	187.8	4.48
11AM27C- 16	0.08829	0.01338	0.01325	0.0004	0.0149477	84.8	2.52
11AM27C- 17	0.14614	0.00864	0.02175	0.00037	0.021412	138.7	2.31
11AM27C- 18	0.1106	0.0091	0.0139	0.00031	0.017033	89	1.99
11AM27C- 19	0.05281	0.01064	0.00836	0.00033	0.0155075	53.6	2.12
11AM27C- 20	0.05666	0.01519	0.00859	0.00042	0.0138249	55.2	2.68
11AM27C- 21	0.10028	0.02137	0.0151	0.00063	0.0147403	96.6	3.98
11AM27C- 22	1.11815	0.08173	0.13188	0.00229	0.0140095	798.6	13.07
11AM27C- 23	0.09623	0.01455	0.01263	0.0005	0.0171821	80.9	3.19
11AM27C- 24	0.0993	0.01218	0.01438	0.00041	0.0168309	92	2.63
11AM27C- 25	0.09476	0.00804	0.01433	0.00031	0.0192786	91.7	2
11AM27C- 26	0.13704	0.01165	0.02051	0.00046	0.0197425	130.9	2.93
11AM27C- 27	0.13247	0.01198	0.01381	0.00036	0.015025	88.4	2.28
11AM27C- 28	0.09383	0.01308	0.0126	0.00041	0.0156728	80.7	2.58
11AM27C- 29	0.10803	0.00851	0.01418	0.00031	0.0182139	90.7	1.99
11AM27C- 30	0.12924	0.00909	0.0169	0.00034	0.0187019	108	2.14
